# Supplementary material for: An earthworm protease cleaving serum fibronectin and decreasing HBeAg in HepG2.2.15 cells
Source: Springer Nature journal article supplement (doi:10.1186/1471-2091-9-30), 2008-11-24

|            |     |     |     |     |     |    |   |   |                      |
|------------|-----|-----|-----|-----|-----|----|---|---|----------------------|
| lane       | 1   | 2   | 3   | 4   | 5   | 6  | 7 | 8 |                      |
| EFNase     | 0.4 | 0.8 | 1.6 | 3.2 | 6.4 | 10 | - | - | ( $\mu\text{M}$ )    |
| serum      | +   | +   | +   | +   | +   | +  | + | - | (0.9 $\mu\text{l}$ ) |
| Mol marker | -   | -   | -   | -   | -   | -  | - | + | (10 $\mu\text{l}$ )  |

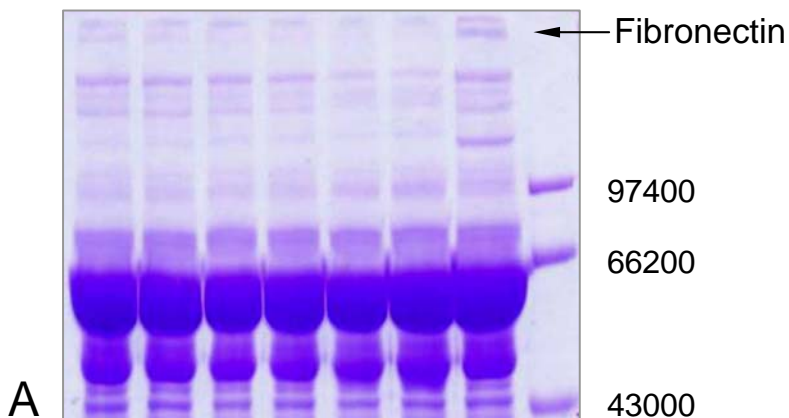

|               |    |    |    |    |    |     |     |   |   |                      |
|---------------|----|----|----|----|----|-----|-----|---|---|----------------------|
| lane          | 1  | 2  | 3  | 4  | 5  | 6   | 7   | 8 | 9 |                      |
| reaction time | 15 | 30 | 45 | 60 | 90 | 120 | 180 | 0 | - | (min)                |
| Trypsin       | +  | +  | +  | +  | +  | +   | +   | - | - | (6.4 $\mu\text{M}$ ) |
| serum         | +  | +  | +  | +  | +  | +   | +   | + | - | (0.9 $\mu\text{l}$ ) |
| Mol marker    | -  | -  | -  | -  | -  | -   | -   | - | + | (10 $\mu\text{l}$ )  |

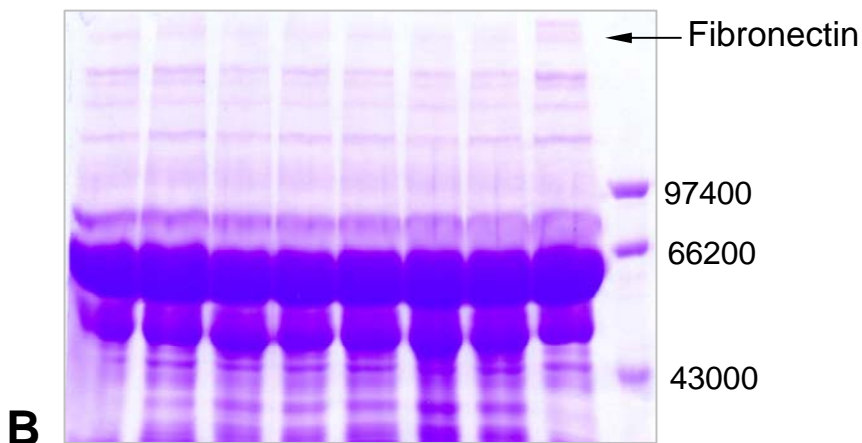

Supplement: Additional file 1 [file 1471-2091-9-30-s1.pdf]
